# Supplementary material for: Dynamics of leaf hydraulic conductance with water status: quantification and analysis of species differences under steady state
Source: PubMed Central journal article supplement — J Exp Bot. 2011 Oct 20;63(2):643–58. doi: 10.1093/jxb/err270 (PMC3254676; doi:10.1093/jxb/err270), 2011-10-20
Supplement: supp_err270_00059410_file001.pdf [file supp_err270_00059410_file001.pdf]

## Dynamics of leaf hydraulic conductance with water status: quantification and analysis of species differences under steady-state

Christine Scoffoni, Athena D McKown, Michael Rawls, and Lawren Sack

**Table S1.** A summary of previous studies of leaf hydraulic vulnerability on whole leaves, indicating the various methods used, the different functions fitted to the data, and whether the data were binned or not before line-fitting. \*Functions were selected for apparent fit “by eye” in most studies, though two studies used maximum likelihood to select the sigmoidal over a linear function for their species and method (Johnson *et al.*, 2009a; Johnson *et al.*, 2009b).

| Study                         | Measurement method                                        | Function fitted*                                                         | Plot for fitting function       |
|-------------------------------|-----------------------------------------------------------|--------------------------------------------------------------------------|---------------------------------|
| Kikuta <i>et al.</i> , 1997   | UAE                                                       | No function                                                              | $\Psi_{\text{lowest}}$ unbinned |
| Salleo <i>et al.</i> , 2000   | UAE                                                       | No function                                                              | $\Psi_{\text{lowest}}$ unbinned |
| Nardini <i>et al.</i> , 2001  | UAE/VPM                                                   | Polynomial                                                               | $\Psi_{\text{lowest}}$ binned   |
| Salleo <i>et al.</i> , 2001   | UAE /Visual                                               | No function                                                              | $\Psi_{\text{lowest}}$ unbinned |
| Brodribb and Holbrook, 2003a  | RKM                                                       | Cumulative normal distribution                                           | $\Psi_{\text{lowest}}$ unbinned |
| Lo Gullo <i>et al.</i> , 2003 | UAE /VPM                                                  | Polynomial                                                               | $\Psi_{\text{lowest}}$ unbinned |
| Nardini <i>et al.</i> , 2003  | VPM/Visual                                                | Sigmoidal                                                                | $\Psi_{\text{lowest}}$ binned   |
| Nardini and Salleo, 2003      | UAE/HPFM                                                  | No function                                                              | $\Psi_{\text{lowest}}$ unbinned |
| Salleo <i>et al.</i> , 2003   | VPM/ Visual                                               | Polynomial                                                               | $\Psi_{\text{lowest}}$ binned   |
| Trifilo <i>et al.</i> , 2003a | VPM                                                       | Linear ( $y = ax + b$ )                                                  | $\Psi_{\text{lowest}}$ unbinned |
| Trifilo <i>et al.</i> , 2003b | VPM/Visual                                                | Linear ( $y = ax + b$ )                                                  | $\Psi_{\text{lowest}}$ unbinned |
| Brodribb and Holbrook, 2004a  | RKM                                                       | Cumulative normal distribution                                           | $\Psi_{\text{lowest}}$ unbinned |
| Brodribb and Holbrook, 2004b  | RKM                                                       | Cumulative normal distribution                                           | $\Psi_{\text{lowest}}$ binned   |
| Brodribb and Holbrook, 2006   | RKM/ Heat-FM                                              | Linear ( $y = ax + b$ ) and sigmoidal ( $y = a/(1 + e^{-((x-x_0)/b)})$ ) | $\Psi_{\text{final}}$           |
| Brodribb and Holbrook, 2007   | Heat-FM                                                   | Linear ( $y = ax + b$ ) and sigmoidal ( $y = a/(1 + e^{-((x-x_0)/b)})$ ) | $\Psi_{\text{final}}$           |
| Woodruff <i>et al.</i> , 2007 | RKM                                                       | Sigmoidal ( $y = a/(1 + e^{-((x-x_0)/b)})$ )                             | $\Psi_{\text{lowest}}$ unbinned |
| Hao <i>et al.</i> , 2008      | RKM                                                       | Sigmoidal                                                                | $\Psi_{\text{lowest}}$ unbinned |
| Woodruff <i>et al.</i> , 2008 | RKM for $K_{\text{shoot}}$ as proxy for $K_{\text{leaf}}$ | Logistic ( $y = a/(1 + (x/x_0)^b)$ )                                     | $\Psi_{\text{lowest}}$ binned   |
| Blackman <i>et al.</i> , 2009 | RKM                                                       | Sigmoidal ( $y = a/(1 + e^{-((x-x_0)/b)})$ )                             | $\Psi_{\text{lowest}}$ unbinned |
| Brodribb and Cochard, 2009    | Dynamic RKM                                               | Sigmoidal ( $y = a/(1 + e^{-((x-x_0)/b)})$ )                             | $\Psi_{\text{lowest}}$ unbinned |
| Chen <i>et al.</i> , 2009     | DKM                                                       | Sigmoidal ( $y = a/(1 + e^{-b(x-c)})$ )                                  | $\Psi_{\text{lowest}}$ binned   |
| Johnson <i>et al.</i> , 2009a | UAE/RKM                                                   | Linear and sigmoidal                                                     | $\Psi_{\text{lowest}}$ unbinned |
| Johnson <i>et al.</i> , 2009b | RKM                                                       | Sigmoidal ( $y = a/(1 + e^{-((x-x_0)/b)})$ )                             | $\Psi_{\text{lowest}}$ unbinned |
| Saha <i>et al.</i> , 2009     | RKM                                                       | No function                                                              | $\Psi_{\text{lowest}}$ unbinned |
| Blackman <i>et al.</i> , 2010 | Dynamic RKM                                               | Sigmoidal ( $y = a/(1 + e^{-((x-x_0)/b)})$ )                             | $\Psi_{\text{lowest}}$ unbinned |

Abbreviations: DKM, dehydration kinetics method; Heat-FM, evaporative flux method with heat gun; HPFM, high pressure flow method; RKM, rehydration kinetics method; UAE, ultrasonic acoustic emissions; Visual, visual method using dyes (i.e., Fluorescein, Phloxine B); VPM, vacuum pump method;

**Table S2.** Minimum and maximum transpirational flow rates ( $E$ ) for each species measured with the evaporative flux method and corresponding estimated stomatal conductances ( $g$ ), and cuticular conductances for these species. The  $g$  was determined by dividing by laboratory average mole fraction vapor pressure deficit ( $0.015 \text{ mol mol}^{-1}$ ). Means  $\pm$  standard errors are reported for the five highest and five lowest  $E$  and  $g$  values for each species ( $E_{\text{highest}}$ ,  $E_{\text{lowest}}$ ,  $g_{\text{highest}}$  and  $g_{\text{lowest}}$  respectively).

| Species                             | $E_{\text{highest}} \pm \text{SE}$<br>( $\text{mmol}\cdot\text{m}^{-2}\cdot\text{s}^{-1}$ ) | $E_{\text{lowest}} \pm \text{SE}$<br>( $\text{mmol}\cdot\text{m}^{-2}\cdot\text{s}^{-1}$ ) | $g_{\text{highest}}$<br>( $\text{mmol}\cdot\text{m}^{-2}\cdot\text{s}^{-1}$ ) | $g_{\text{lowest}}$<br>( $\text{mmol}\cdot\text{m}^{-2}\cdot\text{s}^{-1}$ ) | $g_{\text{min}}$<br>( $\text{mmol}\cdot\text{m}^{-2}\cdot\text{s}^{-1}$ ) |
|-------------------------------------|---------------------------------------------------------------------------------------------|--------------------------------------------------------------------------------------------|-------------------------------------------------------------------------------|------------------------------------------------------------------------------|---------------------------------------------------------------------------|
| <i>Camellia sasanqua</i>            | $1.52 \pm 0.091$                                                                            | $0.453 \pm 0.047$                                                                          | $101 \pm 6.70$                                                                | $30.2 \pm 3.14$                                                              | $1.77 \pm 0.13$                                                           |
| <i>Cercocarpus betuloides</i>       | $2.82 \pm 0.199$                                                                            | $0.300 \pm 0.037$                                                                          | $188 \pm 13.2$                                                                | $20.0 \pm 2.48$                                                              | $3.99 \pm 0.41$                                                           |
| <i>Comarostaphylos diversifolia</i> | $2.28 \pm 0.056$                                                                            | $0.314 \pm 0.087$                                                                          | $152 \pm 3.73$                                                                | $20.9 \pm 5.78$                                                              | $2.87 \pm 0.35$                                                           |
| <i>Hedera canariensis</i>           | $2.30 \pm 0.111$                                                                            | $0.226 \pm 0.032$                                                                          | $153 \pm 7.43$                                                                | $15.04 \pm 2.15$                                                             | $0.44 \pm 0.03$                                                           |
| <i>Helianthus annuus</i>            | $4.30 \pm 0.191$                                                                            | $0.618 \pm 0.089$                                                                          | $286 \pm 12.7$                                                                | $41.2 \pm 5.95$                                                              | $18.3 \pm 1.92$                                                           |
| <i>Heteromeles arbutifolia</i>      | $5.57 \pm 0.087$                                                                            | $0.156 \pm 0.023$                                                                          | $384 \pm 5.80$                                                                | $10.4 \pm 1.50$                                                              | $4.21 \pm 1.22$                                                           |
| <i>Lantana camara</i>               | $4.73 \pm 0.116$                                                                            | $0.618 \pm 0.088$                                                                          | $315 \pm 7.70$                                                                | $41.2 \pm 5.88$                                                              | $12.0 \pm 0.85$                                                           |
| <i>Magnolia grandiflora</i>         | $1.51 \pm 0.146$                                                                            | $0.286 \pm 0.041$                                                                          | $100 \pm 9.76$                                                                | $19.1 \pm 2.72$                                                              | $3.88 \pm 0.41$                                                           |
| <i>Platanus racemosa</i>            | $2.66 \pm 0.170$                                                                            | $0.545 \pm 0.150$                                                                          | $177 \pm 11.4$                                                                | $36.3 \pm 10.0$                                                              | $6.61 \pm 0.41$                                                           |
| <i>Quercus agrifolia</i>            | $1.14 \pm 0.074$                                                                            | $0.152 \pm 0.006$                                                                          | $76.0 \pm 4.96$                                                               | $10.1 \pm 0.43$                                                              | $1.72 \pm 0.23$                                                           |

\* data from Scoffoni *et al.*, 2011

**Table S3.** Parameters for the decline of leaf hydraulic conductance ( $K_{\text{leaf}}$ ) with declining leaf water potential for 10 species fitted with four different functions,  $R^2$  for observed values plotted against predicted values from the fitted function, and values for Akaike Information Criterion (AIC). For each function, three plots were tested for  $K_{\text{leaf}}$  against leaf water potential: (1) “ $\Psi_{\text{lowest}}$  unbinned”, (2) “ $\Psi_{\text{lowest}}$  binned”, (3) “ $\Psi_{\text{final}}$ ” (see “*Methods*” for additional information). Bold and grey shading indicate the best fit model(s) for each plot for each species. Cells were left blank when the maximum likelihood parameters were extremely large or small values.

| Species                | Plot | LINEAR: $K_{\text{leaf}} = a \Psi_{\text{leaf}} + y_0$ |                   |             |               | SIGMOIDAL: $K_{\text{leaf}} = a / (1 + e^{-\frac{\Psi_{\text{leaf}} - x_0}{b}})$ |                   |                   |             |               | LOGISTIC: $K_{\text{leaf}} = a / (1 + (\frac{\Psi_{\text{leaf}}}{x_0})^b)$ |                  |                  |             |               | EXPONENTIAL: $K_{\text{leaf}} = y_0 + a e^{-b \times \Psi_{\text{leaf}}}$ |                  |                   |             |               |
|------------------------|------|--------------------------------------------------------|-------------------|-------------|---------------|----------------------------------------------------------------------------------|-------------------|-------------------|-------------|---------------|----------------------------------------------------------------------------|------------------|------------------|-------------|---------------|---------------------------------------------------------------------------|------------------|-------------------|-------------|---------------|
|                        |      | a                                                      | $y_0$             | $r^2$       | AIC           | a                                                                                | b                 | $x_0$             | $r^2$       | AIC           | a                                                                          | B                | $x_0$            | $r^2$       | AIC           | a                                                                         | b                | $y_0$             | $r^2$       | AIC           |
| <i>C. betuloides</i>   | (1)  | <b>-0.60±0.07</b>                                      | <b>4.01±0.25</b>  | <b>0.49</b> | <b>217.24</b> | <b>7.09±5.76</b>                                                                 | <b>-2.16±1.06</b> | <b>1.01±3.53</b>  | <b>0.52</b> | <b>215.81</b> | <b>4.02±0.49</b>                                                           | <b>2.06±0.76</b> | <b>2.94±0.54</b> | <b>0.51</b> | <b>216.56</b> | <b>5.24±1.38</b>                                                          | <b>0.23±0.13</b> | <b>-0.66±1.59</b> | <b>0.52</b> | <b>216.14</b> |
|                        | (2)  | <b>-0.56±0.08</b>                                      | <b>4.00±0.30</b>  | <b>0.78</b> | <b>28.15</b>  |                                                                                  |                   |                   |             |               | 4.43±0.82                                                                  | 1.14±0.59        | 2.59±0.92        | 0.82        | 30.84         | 4.58±1.11                                                                 | 0.27±0.18        | 0.02±1.36         | 0.83        | 30.36         |
|                        | (3)  | -1.46±0.27                                             | 3.31±0.25         | 0.29        | 240.75        |                                                                                  |                   |                   |             |               | <b>9.43±14.1</b>                                                           | <b>0.82±0.49</b> | <b>0.13±0.42</b> | <b>0.38</b> | <b>234.25</b> | <b>4.36±0.74</b>                                                          | <b>1.72±0.90</b> | <b>0.59±0.65</b>  | <b>0.36</b> | <b>235.55</b> |
| <i>C. diversifolia</i> | (1)  | <b>-0.52±0.06</b>                                      | <b>2.96±1.78</b>  | <b>0.54</b> | <b>130.60</b> | 3.09±1.49                                                                        | -1.32±0.10        | 2.81±1.71         | 0.53        | 134.94        | 7.06±12.6                                                                  | 0.60±0.47        | 0.23±0.13        | 0.52        | 136.01        |                                                                           |                  |                   |             |               |
|                        | (2)  | <b>-0.53±0.08</b>                                      | <b>2.95±0.24</b>  | <b>0.80</b> | <b>19.08</b>  | 2.55±0.47                                                                        | -0.83±0.50        | 3.30±0.50         | 0.59        | 27.21         | 2.33±0.21                                                                  | 5.56±2.82        | 3.44±0.28        | 0.78        | 25.75         |                                                                           |                  |                   |             |               |
|                        | (3)  | -0.50±0.06                                             | 2.62±0.12         | 0.64        | 116.45        |                                                                                  |                   |                   |             |               | <b>5.13±1.80</b>                                                           | <b>1.08±0.27</b> | <b>0.49±0.33</b> | <b>0.74</b> | <b>101.97</b> | <b>3.70±0.38</b>                                                          | <b>0.91±0.23</b> | <b>0.22±0.21</b>  | <b>0.73</b> | <b>103.32</b> |
| <i>H. arbutifolia</i>  | (1)  | <b>-4.02±0.42</b>                                      | <b>20.7±1.22</b>  | <b>0.61</b> | <b>350.53</b> | 34.7±34.1                                                                        | -1.73±0.95        | 0.87±3.45         | 0.60        | 354.64        | 22.3±3.95                                                                  | 1.52±0.57        | 1.95±0.68        | 0.58        | 357.58        | 56.8±82.0                                                                 | 0.09±0.16        | -35.3±83.4        | 0.61        | 352.534       |
|                        | (2)  | <b>-3.94±0.41</b>                                      | <b>20.2±0.53</b>  | <b>0.84</b> | <b>56.74</b>  | 54.9±163                                                                         | -2.06±0.79        | -0.79±10.2        | 0.82        | 63.97         | 23.0±5.63                                                                  | 1.40±0.59        | 1.73±0.84        | 0.80        | 65.19         | 63.8±156                                                                  | 0.07±0.22        | -42.9±158         | 0.84        | 62.64         |
|                        | (3)  | <b>-19.2±4.44</b>                                      | <b>17.0±1.71</b>  | <b>0.24</b> | <b>389.29</b> |                                                                                  |                   |                   |             |               | <b>20.8±7.11</b>                                                           | <b>1.61±0.78</b> | <b>0.29±0.14</b> | <b>0.28</b> | <b>389.02</b> | <b>22.0±4.78</b>                                                          | <b>3.29±2.39</b> | <b>1.97±5.15</b>  | <b>0.27</b> | <b>389.17</b> |
| <i>H. canariensis</i>  | (1)  | -1.53±0.18                                             | 3.79±0.30         | 0.63        | 121.51        | <b>26.7±53.3</b>                                                                 | <b>-0.59±0.15</b> | <b>-0.60±0.15</b> | <b>0.87</b> | <b>79.75</b>  | <b>5.74±0.57</b>                                                           | <b>2.27±0.34</b> | <b>0.64±0.08</b> | <b>0.88</b> | <b>79.13</b>  | <b>7.49±0.57</b>                                                          | <b>1.55±0.21</b> | <b>0.05±0.21</b>  | <b>0.88</b> | <b>79.92</b>  |
|                        | (2)  | <b>-1.61±0.39</b>                                      | <b>4.06±0.69</b>  | <b>0.74</b> | <b>33.21</b>  |                                                                                  |                   |                   |             |               | 5.88±0.22                                                                  | 2.24±0.12        | 0.63±0.03        | 0.999       | 31.95         | 8.10±0.19                                                                 | 1.73±0.07        | 0.15±0.05         | 0.999       | 31.30         |
|                        | (3)  | -1.71±0.24                                             | 3.68±0.33         | 0.56        | 129.08        | <b>15.7±16.8</b>                                                                 | <b>-0.45±0.13</b> | <b>-0.08±0.80</b> | <b>0.83</b> | <b>91.89</b>  | <b>5.75±0.63</b>                                                           | <b>2.53±0.44</b> | <b>0.60±0.07</b> | <b>0.84</b> | <b>91.06</b>  | <b>7.98±0.73</b>                                                          | <b>1.73±0.27</b> | <b>-0.06±0.07</b> | <b>0.83</b> | <b>92.45</b>  |
| <i>Q. agrifolia</i>    | (1)  | <b>-0.83±0.12</b>                                      | <b>3.96±0.29</b>  | <b>0.49</b> | <b>141.72</b> | <b>3.99±0.82</b>                                                                 | <b>-0.93±0.43</b> | <b>2.39±0.53</b>  | <b>0.50</b> | <b>143.46</b> | <b>3.45±0.28</b>                                                           | <b>3.77±1.53</b> | <b>2.61±0.24</b> | <b>0.50</b> | <b>143.55</b> |                                                                           |                  |                   |             |               |
|                        | (2)  | <b>-0.78±0.16</b>                                      | <b>3.95±0.42</b>  | <b>0.75</b> | <b>26.96</b>  | 3.76±0.87                                                                        | -0.88±0.54        | 2.71±0.63         | 0.76        | 35.68         | 3.37±0.35                                                                  | 4.21±2.07        | 2.86±0.33        | 0.77        | 35.39         |                                                                           |                  |                   |             |               |
|                        | (3)  | -0.86±0.25                                             | 2.68±0.22         | 0.20        | 162.96        | <b>3.17±0.60</b>                                                                 | <b>-0.09±0.08</b> | <b>0.37±0.05</b>  | <b>0.32</b> | <b>157.64</b> | <b>2.98±0.28</b>                                                           | <b>4.94±2.93</b> | <b>0.37±0.05</b> | <b>0.32</b> | <b>157.50</b> | <b>3.77±0.83</b>                                                          | <b>2.07±0.92</b> | <b>0.04±0.70</b>  | <b>0.31</b> | <b>158.56</b> |
| <i>C. sansanqua</i>    | (1)  | <b>-1.69±0.33</b>                                      | <b>5.99±0.52</b>  | <b>0.39</b> | <b>160.18</b> | <b>5.53±0.78</b>                                                                 | <b>-0.54±0.24</b> | <b>1.93±0.23</b>  | <b>0.41</b> | <b>161.08</b> | <b>5.26±0.48</b>                                                           | <b>3.49±1.44</b> | <b>1.94±0.20</b> | <b>0.42</b> | <b>160.93</b> |                                                                           |                  |                   |             |               |
|                        | (2)  | <b>-1.90±0.29</b>                                      | <b>-6.22±0.48</b> | <b>0.88</b> | <b>28.43</b>  | 5.46±0.46                                                                        | -0.47±0.12        | 1.90±0.14         | 0.94        | 54.56         | 5.27±0.32                                                                  | 3.93±0.98        | 1.88±0.13        | 0.94        | 54.4          |                                                                           |                  |                   |             |               |
|                        | (3)  | -3.36±0.78                                             | 4.98±0.40         | 0.31        | 168.09        |                                                                                  |                   |                   |             |               | <b>13.8±13.2</b>                                                           | <b>1.05±0.54</b> | <b>0.10±0.18</b> | <b>0.54</b> | <b>153.60</b> | <b>8.95±1.54</b>                                                          | <b>4.09±1.52</b> | <b>0.86±0.90</b>  | <b>0.54</b> | <b>154.24</b> |
| <i>H. annuus</i>       | (1)  | -4.63±0.76                                             | 7.50±0.73         | 0.51        | 153.57        | <b>7.41±2.06</b>                                                                 | <b>-0.24±0.12</b> | <b>0.78±1.17</b>  | <b>0.58</b> | <b>150.94</b> | <b>6.45±0.75</b>                                                           | <b>4.15±1.45</b> | <b>0.83±0.08</b> | <b>0.59</b> | <b>149.49</b> | 11.71±1.80                                                                | 1.17±0.72        | -1.20±2.61        | 0.55        | 152.99        |
|                        | (2)  | <b>-3.88±0.82</b>                                      | <b>6.80±0.88</b>  | <b>0.76</b> | <b>34.45</b>  | 6.17±1.10                                                                        | -0.19±0.11        | 0.88±0.10         | 0.86        | 44.68         | 5.83±0.59                                                                  | 4.96±1.80        | 0.88±0.07        | 0.88        | 43.47         | 10.83±2.49                                                                | 0.92±0.75        | -1.82±3.66        | 0.81        | 46.98         |
|                        | (3)  | -4.28±0.92                                             | 6.64±0.77         | 0.38        | 162.26        | <b>5.61±0.76</b>                                                                 | <b>-0.13±0.07</b> | <b>0.79±0.07</b>  | <b>0.44</b> | <b>160.78</b> | <b>5.48±0.58</b>                                                           | <b>5.72±2.55</b> | <b>0.79±0.07</b> | <b>0.46</b> | <b>159.77</b> | 11.1±5.66                                                                 | 0.74±0.86        | -3.18±6.96        | 0.39        | 164.01        |
| <i>L. camara</i>       | (1)  | -5.40±0.52                                             | 10.8±0.67         | 0.81        | 103.21        | <b>34.6±55.5</b>                                                                 | <b>-0.61±0.21</b> | <b>-0.19±1.54</b> | <b>0.89</b> | <b>91.66</b>  | <b>11.4±1.44</b>                                                           | <b>2.43±0.49</b> | <b>0.80±0.12</b> | <b>0.89</b> | <b>91.17</b>  | <b>16.4±1.33</b>                                                          | <b>1.31±0.36</b> | <b>-0.20±1.19</b> | <b>0.89</b> | <b>91.89</b>  |
|                        | (2)  | <b>-5.12±0.74</b>                                      | <b>10.6±1.01</b>  | <b>0.90</b> | <b>44.53</b>  | 38.5±13.3                                                                        | -0.63±0.04        | -0.29±0.33        | 0.999       | Inf           | 11.4±0.06                                                                  | 2.45±0.02        | 0.81±0.01        | 0.999       | Inf           | 16.50±0.35                                                                | 1.29±0.09        | -0.23±0.28        | 0.998       | Inf           |
|                        | (3)  | <b>-5.27±1.16</b>                                      | <b>8.71±1.04</b>  | <b>0.44</b> | <b>130.84</b> | <b>7.73±2.03</b>                                                                 | <b>-0.23±0.16</b> | <b>0.87±0.18</b>  | <b>0.47</b> | <b>132.46</b> | <b>7.11±0.96</b>                                                           | <b>4.31±2.32</b> | <b>0.89±0.13</b> | <b>0.47</b> | <b>132.22</b> | 17.1±19.1                                                                 | 0.49±0.93        | -7.35±21.0        | 0.45        | 133.36        |
| <i>M. grandiflora</i>  | (1)  | -0.58±0.08                                             | 2.54±0.19         | 0.40        | 194.76        |                                                                                  |                   |                   |             |               | <b>5.24±2.62</b>                                                           | <b>0.87±0.29</b> | <b>0.42±0.50</b> | <b>0.48</b> | <b>187.02</b> | 3.22±0.63                                                                 | 1.14±0.67        | 0.68±0.33         | 0.46        | 189.47        |
|                        | (2)  | <b>-0.55±0.10</b>                                      | <b>2.47±0.28</b>  | <b>0.76</b> | <b>21.07</b>  |                                                                                  |                   |                   |             |               | <b>21.4±34.6</b>                                                           | <b>0.75±0.13</b> | <b>0.03±0.09</b> | <b>0.89</b> | <b>20.94</b>  | 3.33±0.48                                                                 | 0.71±0.41        | 0.22±0.49         | 0.86        | 23.66         |
|                        | (3)  | -0.68±0.11                                             | 2.06±0.16         | 0.32        | 203.52        |                                                                                  |                   |                   |             |               |                                                                            |                  |                  |             |               | <b>7.43±1.50</b>                                                          | <b>4.49±0.94</b> | <b>0.64±0.15</b>  | <b>0.67</b> | <b>153.15</b> |
| <i>P. racemosa</i>     | (1)  | -3.25±0.63                                             | 7.28±0.90         | 0.46        | 154.75        |                                                                                  |                   |                   |             |               | <b>34.1±23.2</b>                                                           | <b>1.06±0.23</b> | <b>0.09±0.11</b> | <b>0.82</b> | <b>121.24</b> | 19.45±2.73                                                                | 3.39±0.64        | 1.53±0.38         | 0.81        | 123.73        |
|                        | (2)  | <b>-2.87±0.83</b>                                      | <b>7.08±1.42</b>  | <b>0.66</b> | <b>40.80</b>  |                                                                                  |                   |                   |             |               |                                                                            |                  |                  |             |               | 20.2±6.28                                                                 | 2.89±0.95        | 1.06±0.41         | 0.95        | 58.91         |
|                        | (3)  | -4.92±1.08                                             | 6.73±0.90         | 0.39        | 158.119       |                                                                                  |                   |                   |             |               |                                                                            |                  |                  |             |               | <b>20.4±5.97</b>                                                          | <b>6.41±2.33</b> | <b>1.63±0.58</b>  | <b>0.69</b> | <b>139.85</b> |
